# Association of *ACE2* Genetic Variants With Blood Pressure, Left Ventricular Mass, and Cardiac Function in Caucasians With Type 2 Diabetes

Sheila K. Patel<sup>1</sup>, Bryan Wai<sup>1,2</sup>, Michelle Ord<sup>2</sup>, Richard J. Maclsaac<sup>1,3</sup>, Sharon Grant<sup>1</sup>, Elena Velkoska<sup>1</sup>, Sianna Panagiotopoulos<sup>4</sup>, George Jerums<sup>1,4</sup>, Piyush M. Srivastava<sup>1,2</sup> and Louise M. Burrell<sup>1,2</sup>

## BACKGROUND

Cardiovascular disease is common in diabetes, and is associated with activation of the renin–angiotensin system (RAS). Angiotensin-converting enzyme (*ACE*)2 is a recently described member of the RAS, and this study investigated whether *ACE2* polymorphisms are associated with hypertension, left ventricular (LV) mass, and cardiac function in type 2 diabetes.

## METHODS

Variants in *ACE2* (rs1978124, rs2074192, rs4240157, rs4646156, rs4646188) were examined in 503 Caucasian subjects with type 2 diabetes. As *ACE2* is located on the X chromosome, analyses were performed separately for men and women. Hypertension was defined by a history of hypertension, and/or antihypertensive medications or blood pressure (BP) >130/80 mm Hg. LV mass and systolic function (ejection fraction) were assessed by transthoracic echocardiography.

## RESULTS

In men, hypertension was more prevalent with the *ACE2* rs2074192 C allele ( $P = 0.023$ ), rs4240157 G allele ( $P = 0.016$ ) and rs4646188 T allele ( $P = 0.006$ ). In men, the rs1978124 A allele was associated with a

significantly lower ejection fraction compared to the G allele ( $62.3 \pm 13.3$  vs.  $67.2 \pm 10.9\%$ ,  $P = 0.002$ ). This association remained significant after covariate adjustment for age, body mass index, hypertension, antihypertensive treatment, and BP. In women, the prevalence of hypertension was higher ( $P = 0.009$ ) with the rs4240157 G allele, and the rs1978124 A allele was associated with significantly higher LV mass ( $P = 0.008$ ).

## CONCLUSIONS

In Caucasians with type 2 diabetes, genetic variation in *ACE2* is associated with hypertension and reduced systolic function in men, and hypertension and increased LV mass in women.

**Keywords:** angiotensin-converting enzyme 2; blood pressure; cardiac function; cardiac hypertrophy; hypertension; renin–angiotensin system; type 2 diabetes

*American Journal of Hypertension*, advance online publication 13 October 2011; doi:10.1038/ajh.2011.188

Type 2 diabetes mellitus is a coronary heart disease risk equivalent<sup>1</sup> associated with a significant cardiovascular disease burden,<sup>2,3</sup> which includes a two to threefold increase in cardiac death<sup>4</sup> and an increased risk of heart failure.<sup>5</sup> Diabetes also directly contributes to the development of hypertension and left ventricular (LV) hypertrophy (LVH).<sup>6</sup>

Activation of the renin–angiotensin system (RAS) plays an important role in the development and progression of cardiovascular complications in diabetes, and blockade of the RAS by angiotensin-converting enzyme (*ACE*) inhibitors and angiotensin (Ang) II receptor blockers have been shown to reduce

blood pressure (BP) and the cardiac and renal complications of diabetes.<sup>7</sup> The enzyme *ACE* converts Ang I to the vasoconstrictor peptide Ang II which is the main effector of the RAS. *ACE2* is a recently discovered homologue of *ACE*,<sup>8,9</sup> with one active enzymatic site and is responsible for degrading Ang II to the vasodilator Ang 1–7. *ACE2* expression is mainly limited to the heart and kidney, and *ACE2* is thought to act in a counter-regulatory manner to *ACE* to limit the detrimental effects of Ang II.<sup>10</sup> The *ACE2* gene maps to chromosome Xp22 and contains 18 exons spanning ~40 kb of genomic DNA and encoding a protein of 805 amino acids.<sup>9</sup>

A number of experimental studies suggest that *ACE2* may protect against increased BP and cardiac dysfunction. In three strains of genetically hypertensive rats, the *ACE2* gene maps to a quantitative trait locus on the X chromosome that was previously identified as a quantitative locus for BP.<sup>11</sup> Higher BP has been associated with reduced renal *ACE2* mRNA and protein levels in experimental models<sup>11,12</sup> suggesting that *ACE2* may

<sup>1</sup>Department of Medicine, University of Melbourne, Austin Health, Victoria, Australia; <sup>2</sup>Department of Cardiology, Austin Health, Victoria, Australia; <sup>3</sup>Department of Endocrinology and Diabetes, St Vincent's Hospital, Victoria, Australia; <sup>4</sup>Endocrine Centre of Excellence, Austin Health, Victoria, Australia. Correspondence: Sheila K. Patel (skpatel@unimelb.edu.au)

Received 29 May 2011; first decision 12 July 2011; accepted 24 August 2011.

© 2012 American Journal of Hypertension, Ltd.

have a protective effect. Certainly, in ACE2 knockout mice,<sup>11</sup> which lack ACE2, BP is increased, and cardiac systolic function is severely impaired. Interestingly the abnormalities are more severe in male than female mice, and the phenotype more pronounced in older animals. Other studies have shown that deletion of ACE2 accelerates cardiac hypertrophy and shortens the time taken for mice to go from compensatory hypertrophy to cardiac failure.<sup>13</sup>

Currently, few studies have investigated whether common single-nucleotide polymorphisms (SNPs) in the human ACE2 locus correlate to changes in BP or cardiac function. The results available differ according to the ethnicity of the population, as well as the phenotype of the population studied. The allele frequencies of ACE2 SNPs are significantly different between subjects of Asian and European ancestry, and the SNP alleles associated with BP in Chinese populations are not common or represented in European populations.<sup>14–16</sup> Thus in Chinese women, there are significant associations with ACE2 SNP rs228566 and essential hypertension<sup>14</sup> and diastolic BP<sup>17</sup> and ACE2 (rs1978124, rs4646142) with myocardial infarction.<sup>18</sup> However, in Australian Caucasians with essential hypertension, no association between four ACE2 SNPs (rs1978124, rs2285666, rs879922, rs714205) and hypertension was found in either men or women.<sup>15</sup> Similarly in a cohort of Austrian subjects randomly recruited from the general population as part of the MONICA study,<sup>19</sup> no association with BP levels was reported in men or women. However, there were significant associations with four ACE2 gene SNPs (rs4646156, rs879922, rs4240157 and rs233575) with higher LV mass and LVH in men, but not in women. In a study of 729 men recruited after admission for an acute coronary syndrome event, the A allele of the ACE2 rs1978124 was significantly associated with male survival in a New Zealand Caucasian population.<sup>20</sup> There appear to be similarities in the association of ACE2 rs1978124 in Chinese and Caucasian populations with regard to coronary heart disease and myocardial infarction.<sup>18,20</sup>

In summary, the limited reported studies to date have given conflicting results which may be partially explained by the cohort under investigation. Moreover, although cardiovascular disease is common in diabetes,<sup>21,22</sup> there have been no previous reports of associations of ACE2 polymorphisms and cardiovascular disease in diabetes. Thus, the aim of this study was to assess whether genetic variations in ACE2 are associated with hypertension, LVH and cardiac dysfunction in a cohort of subjects with type 2 diabetes.

## METHODS

**Study sample.** Subjects with type 2 diabetes attending for a transthoracic echocardiogram as part of a routine complications surveillance program at Austin Health, Melbourne, Australia were prospectively recruited as previously described.<sup>22</sup> As our primary referral base (80%) is from general practitioners, with only 20% referred from within the hospital, the cohort is representative of subjects with type 2 diabetes seen in the wider community. Ethical approval was obtained from the Human

Research Ethics Committee at Austin Health. Subjects of non-European ancestry were excluded, as were those with moderate/severe valvular dysfunction.

**Medical history and clinical measurements.** Each subject completed a questionnaire at the time of the echocardiogram, crosschecked by medical record review. Information on diabetes duration, history of hypertension, antihypertensive drug therapy (ACE inhibitors, Ang receptor blockers, diuretics, calcium-channel blockers,  $\beta$ -blockers) and ethnic background was obtained. Height and weight were measured as previously described.<sup>22</sup> BP was measured manually using a mercury sphygmomanometer at the time of the echocardiogram in a supine position, after the subject was rested quietly for 5 min. Hypertension was defined as present if participants were on antihypertensive medication, had a history of hypertension and/or had evidence of hypertension (clinic BP >130/80 mm Hg).<sup>23</sup> Glycosylated hemoglobin (HbA<sub>1c</sub>) was measured at Austin Health, and whole blood collected for DNA extraction.

**Echocardiography.** Transthoracic echocardiography was performed as previously described using a commercially available ultrasound system (Vivid 7, 3.5 MHz transducer).<sup>22,24,25</sup> Standard parasternal and apical views were used to assess LV mass and LV systolic function. M-mode echocardiography was used to measure cardiac dimensions and wall thickness. Body surface area was calculated using the Mosteller formula<sup>26</sup> and LV mass was indexed to body surface area.<sup>24</sup> LVH was defined as LV mass index >115 g/m<sup>2</sup> in men and >95 g/m<sup>2</sup> in women.<sup>24</sup> LV ejection fraction (LVEF) was calculated as previously described.<sup>22</sup>

**Genotyping.** Genomic DNA was extracted using a Nucleon BACC2 kit DNA (GE Healthcare, Sydney, Australia). Analysis of the linkage disequilibrium ( $D'$  and  $r^2$ ) and haplotype structure of the ACE2 gene was performed using the HapMap phase II project data from CEPH Caucasian trios and the Haploview software (version 4.2).<sup>27,28</sup> The haplotype tagging SNPs that defined the underlying haplotype structures were identified using pairwise tagging with  $r^2$  thresholds of 0.8 and minor allele frequency thresholds of 0.05. Five tagging SNPs captured all the common variation across the ACE2 gene. These SNPs were rs1978124 G/A, rs2074192 C/T, rs4240157 A/G, rs4646156 A/T, rs4646188 T/C. The tagging SNPs were genotyped using the Sequenom MassARRAY system (Sequenom, San Diego, CA) at the Australian Genome Research Facility (AGRF, Brisbane, Australia). Of the genotyped samples, 10% were duplicates and there were at least four negative controls per 96 well plate. Genotyping accuracy was determined by the genotype concordance between duplicate samples and was 100% for each of the SNPs.

**Statistical analyses.** As the ACE2 gene is located on the X chromosome, males and females were analyzed separately. As males are hemizygous for ACE2, Hardy–Weinberg equilibrium was assessed only in females. All analysis was performed using

SPSS version 18 (SPSS, Chicago, IL). All continuous variables studied were normally distributed (except for diabetes duration) and presented as means  $\pm$  s.d. Diabetes duration is presented as the median and the interquartile range (25th–75th quartile). The relationship between each SNP with continuous variables (systolic and diastolic BP, LV mass, LVEF) were examined by linear regression using the additive, dominant and recessive genetic models (men are hemizygous therefore only the dominant model was examined). By linear regression analysis the rs1978124 SNP associations were significant with the dominant genetic model (genotypes GG vs. AA) with LVEF in men, and the recessive model (genotypes GG + GA vs. AA) with LV mass in women. The significant SNP associations were examined further using multiple linear regression analysis to test for associations between SNP rs1978124 geno-

types and continuous variables (LV mass, LVEF) after adjusting for confounding variables (age, body mass index (BMI), hypertension, use of antihypertensive medication, systolic and diastolic BP). Normality was assessed by evaluating quantile–quantile plots for continuous variables and all quantile–quantile plots were normal. Differences in the prevalence of hypertension and LVH with SNPs were assessed by chi square analysis using the dominant genetic model. Significant SNP associations with hypertension were further assessed using a logistic regression model with hypertension as a dependent variable and genotype, age, BMI, and antihypertensive medication use as independent variables. Logistic regression analysis is presented as odds ratio (95% confidence intervals), *P* values. Two-tailed *P* values  $<0.05$  were considered significant; however, allowance for multiple testing was done by the interpretation of the significant results for testing the five ACE2 SNPs (a global significance level of 0.05 means a single test significance level of 0.01).

**Table 1 | Characteristics of study participants, data shown in the whole cohort and stratified by gender**

|                                                 | Whole cohort    | Men              | Women           |
|-------------------------------------------------|-----------------|------------------|-----------------|
| <i>n</i>                                        | 503             | 279              | 224             |
| Age (years)                                     | 61.9 $\pm$ 14.2 | 61.0 $\pm$ 15.0  | 63.1 $\pm$ 13.0 |
| BMI (kg/m <sup>2</sup> )                        | 30.7 $\pm$ 6.2  | 29.8 $\pm$ 5.0   | 31.9 $\pm$ 7.2  |
| Diabetes duration (years) <sup>a</sup>          | 11 (5.0, 18.0)  | 10 (5.0, 17.0)   | 11 (5.1, 19.8)  |
| HbA <sub>1c</sub> (%)                           | 7.7 $\pm$ 1.2   | 7.7 $\pm$ 1.3    | 7.8 $\pm$ 1.1   |
| <b>Blood pressure</b>                           |                 |                  |                 |
| Systolic BP (mm Hg)                             | 137 $\pm$ 19    | 135 $\pm$ 18     | 139 $\pm$ 20    |
| Diastolic BP (mm Hg)                            | 75 $\pm$ 10     | 76 $\pm$ 10      | 75 $\pm$ 10     |
| Hypertension, % ( <i>n</i> )                    | 80 (404)        | 79 (216)         | 84 (188)        |
| Antihypertensive medication use, % ( <i>n</i> ) | 68 (339)        | 66 (182)         | 70 (157)        |
| <b>Cardiac structure</b>                        |                 |                  |                 |
| LV mass index (g/m <sup>2</sup> )               | 99.4 $\pm$ 27.5 | 102.8 $\pm$ 27.8 | 95.2 $\pm$ 26.7 |
| LVH, % ( <i>n</i> )                             | 32 (139)        | 24 (60)          | 40 (79)         |
| <b>Systolic function</b>                        |                 |                  |                 |
| LV ejection fraction (%)                        | 67.7 $\pm$ 11.9 | 65.5 $\pm$ 12.5  | 70.4 $\pm$ 10.6 |

Data is expressed as mean  $\pm$  s.d.

BMI, body mass index; BP, blood pressure; HbA<sub>1c</sub>, glycosylated hemoglobin; LV, left ventricle; LV mass index, indexed to body surface area; LVH, left ventricular hypertrophy (defined as LV mass index  $>115$  g/m<sup>2</sup> men and  $>95$  g/m<sup>2</sup> in women).

<sup>a</sup>Median (25th, 75th quartiles) or % (numbers).

## RESULTS

### Characteristics of the study participants with type 2 diabetes

As shown in **Table 1**, there were 503 subjects (279 men, 224 women) aged 61.9  $\pm$  14.2 years (mean  $\pm$  s.d.), with a BMI of 30.7  $\pm$  6.2 kg/m<sup>2</sup> and median (25th, 75th interquartile range) diabetes duration of 11 (5, 18) years. Mean HbA<sub>1c</sub> was 7.7  $\pm$  1.2% and similar in men and women. Hypertension was present in 80% of the cohort. The LV mass index was 99.4 g/m<sup>2</sup>, and LVEF was 67.7  $\pm$  11.9%. Women were older and had higher systolic BPs, increased prevalence of hypertension and antihypertensive medication use compared to men. In keeping with this, LVH was present in 40% of females and 24% of men. Men had a lower LVEF (65%) compared to women (70%), although in both genders, systolic function was in the normal range.

### ACE2 SNPs and genotype frequencies

All genotyped SNPs were in Hardy–Weinberg equilibrium. Five tagging SNPs (rs1978124, rs2074192, rs4240157, rs4646156, and rs4646188) captured all the common variation (minor allele frequencies  $>5\%$ ) in the ACE2 region from HapMapII (captured 20 SNPs with an  $r^2 >0.8$  and mean  $r^2$  of 0.981). Information on SNP locations, allele and genotype frequencies are shown in **Table 2**.

**Table 2 | Descriptive information on ACE2 SNPs and genotype frequencies**

| SNPs <sup>a</sup> | Chromosome X position <sup>b</sup> | Gene region | Major/minor alleles | MAF  | Genotype frequencies, % ( <i>n</i> ) |               |               |               |              |
|-------------------|------------------------------------|-------------|---------------------|------|--------------------------------------|---------------|---------------|---------------|--------------|
|                   |                                    |             |                     |      | Men                                  |               | Women         |               |              |
| rs1978124         | 15618063                           | Intron 1    | G/A                 | 0.49 | GG 48.5 (133)                        | AA 51.5 (141) | GG 24.6 (55)  | GA 48.2 (108) | AA 27.2 (61) |
| rs4646188         | 15601343                           | Intron 7    | T/C                 | 0.10 | TT 85.4 (229)                        | CC 14.6 (39)  | TT 83.4 (176) | TC 13.7 (29)  | CC 2.8 (6)   |
| rs4646156         | 15597043                           | Intron 8    | A/T                 | 0.38 | AA 62.2 (173)                        | TT 37.8 (105) | AA 40.8 (91)  | AT 42.2 (94)  | TT 17.0 (38) |
| rs4240157         | 15586964                           | Intron 14   | A/G                 | 0.37 | AA 60.9 (170)                        | GG 39.1 (109) | AA 41.5 (93)  | AG 42.4 (95)  | GG 16.1 (36) |
| rs2074192         | 15582790                           | Intron 16   | C/T                 | 0.44 | CC 57.1 (149)                        | TT 42.9 (112) | CC 34.0 (70)  | CT 44.7 (92)  | TT 21.4 (44) |

ACE2, angiotensin-converting enzyme 2; MAF, minor allele frequency; SNP, single-nucleotide polymorphism.

<sup>a</sup>dbSNP rs identification numbers (<http://www.ncbi.nlm.nih.gov/SNP/>; last accessed May 2011). <sup>b</sup>Chromosome X SNP positions using the genomic contig NT\_167197.1 ([http://www.ncbi.nlm.nih.gov/nucore/NT\\_167197.1](http://www.ncbi.nlm.nih.gov/nucore/NT_167197.1); last accessed July 2011).

**Table 3 | Association of ACE2 SNPs with blood pressure, hypertension, LVH, and cardiac function in men and women**

| SNPs             | Genotypes      | Systolic BP (mm Hg) | Diastolic BP (mm Hg) | Hypertension, % (n) | LV mass (g/m <sup>2</sup> ) | LVH, % (n) | LV ejection fraction (%) |
|------------------|----------------|---------------------|----------------------|---------------------|-----------------------------|------------|--------------------------|
| <i>rs1978124</i> |                |                     |                      |                     |                             |            |                          |
| Men              | GG             | 135 ± 19            | 76 ± 11              | 76.7 (102)          | 98.1 ± 23.7                 | 19 (20)    | 67.2 ± 10.9              |
|                  | AA             | 136 ± 17            | 76 ± 9               | 80.1 (113)          | 104.6 ± 29.4                | 25 (29)    | 62.3 ± 13.3              |
|                  | <i>P</i> value | 0.535               | 0.887                | 0.487               | 0.07                        | 0.185      | 0.002                    |
| Women            | GG             | 137 ± 22            | 75 ± 10.7            | 80.0 (44)           | 92.1 ± 23.3 <sup>a</sup>    | 60 (27)    | 70.0 ± 9.5               |
|                  | GA + AA        | 139 ± 19            | 74 ± 10.4            | 85.2 (144)          | 103.5 ± 32.1 <sup>a</sup>   | 58 (84)    | 71.7 ± 9.1               |
|                  | <i>P</i> value | 0.346               | 0.671                | 0.361               | 0.008                       | 0.548      | 0.269                    |
| <i>rs4646188</i> |                |                     |                      |                     |                             |            |                          |
| Men              | TT             | 136 ± 20            | 76 ± 11              | 81.2 (186)          | 102.1 ± 27.7                | 25 (49)    | 65.9 ± 12.7              |
|                  | CC             | 132 ± 17            | 76 ± 9               | 61.5 (24)           | 99.4 ± 23.0                 | 18 (6)     | 68.8 ± 10.2              |
|                  | <i>P</i> value | 0.225               | 0.204                | 0.006               | 0.586                       | 0.253      | 0.219                    |
| Women            | TT             | 138 ± 20            | 74 ± 10              | 83.0 (146)          | 95.8 ± 28.5                 | 43 (68)    | 71.5 ± 9.5               |
|                  | TC + CC        | 146 ± 19            | 78 ± 11              | 88.6 (31)           | 90.5 ± 17.4                 | 39 (11)    | 69.6 ± 8.0               |
|                  | <i>P</i> value | 0.048               | 0.054                | 0.409               | 0.331                       | 0.428      | 0.316                    |
| <i>rs4646156</i> |                |                     |                      |                     |                             |            |                          |
| Men              | AA             | 135 ± 20            | 76 ± 11              | 75.7 (131)          | 99.7 ± 25.4                 | 25 (36)    | 67.5 ± 12.1              |
|                  | TT             | 138 ± 15            | 77 ± 9               | 84.8 (89)           | 105.2 ± 29.0                | 24 (22)    | 64.8 ± 12.5              |
|                  | <i>P</i> value | 0.17                | 0.233                | 0.072               | 0.121                       | 0.505      | 0.105                    |
| Women            | AA             | 136 ± 21            | 74 ± 10              | 78.0 (71)           | 90.8 ± 22.9                 | 36 (29)    | 70.9 ± 9.0               |
|                  | AT + TT        | 142 ± 18            | 74 ± 11              | 87.3 (116)          | 98.4 ± 27.9                 | 48 (54)    | 71.8 ± 9.4               |
|                  | <i>P</i> value | 0.062               | 0.953                | 0.049               | 0.045                       | 0.064      | 0.519                    |
| <i>rs4240157</i> |                |                     |                      |                     |                             |            |                          |
| Men              | AA             | 134 ± 20            | 75 ± 10              | 74.1 (126)          | 100.5 ± 25.9                | 25 (36)    | 65.3 ± 12.4              |
|                  | GG             | 138 ± 15            | 77 ± 9               | 86.2 (94)           | 103.9 ± 28.4                | 23 (22)    | 64.1 ± 12.4              |
|                  | <i>P</i> value | 0.126               | 0.32                 | 0.016               | 0.339                       | 0.428      | 0.477                    |
| Women            | AA             | 136 ± 21            | 74 ± 10              | 76.3 (71)           | 91.0 ± 23.4                 | 35 (28)    | 71.0 ± 8.7               |
|                  | AG + GG        | 142 ± 19            | 74 ± 10              | 89.3 (117)          | 97.9 ± 27.7                 | 48 (55)    | 71.7 ± 9.6               |
|                  | <i>P</i> value | 0.047               | 0.899                | 0.009               | 0.07                        | 0.051      | 0.53                     |
| <i>rs2074192</i> |                |                     |                      |                     |                             |            |                          |
| Men              | CC             | 138 ± 17            | 77 ± 10              | 83.9 (125)          | 102.4 ± 28.0                | 25 (32)    | 65.2 ± 12.0              |
|                  | TT             | 133 ± 20            | 75 ± 10              | 72.3 (81)           | 101.0 ± 25.5                | 22 (22)    | 64.5 ± 12.9              |
|                  | <i>P</i> value | 0.061               | 0.254                | 0.023               | 0.684                       | 0.372      | 0.687                    |
| Women            | CC             | 137 ± 20            | 74 ± 10              | 81.4 (57)           | 98.2 ± 28.6                 | 48 (30)    | 69.0 ± 12.0              |
|                  | CT + TT        | 139 ± 19            | 74 ± 10              | 85.3 (116)          | 94.3 ± 25.4                 | 41 (49)    | 71.0 ± 9.8               |
|                  | <i>P</i> value | 0.631               | 0.872                | 0.474               | 0.351                       | 0.249      | 0.239                    |

Data expressed as mean ± s.d. Differences in proportions of subjects with hypertension and LVH were compared by  $\chi^2$  analysis.

ACE2, angiotensin-converting enzyme 2; BP, blood pressure; LV, left ventricular mass (indexed to body surface area); LVH, left ventricular hypertrophy (defined as LV mass > 115 g/m<sup>2</sup> men and > 95 g/m<sup>2</sup> in women); SNP, single-nucleotide polymorphism.

<sup>a</sup>Data and *P* values are for the recessive model for SNP rs1978124, GG + GA vs. AA.

### Association of ACE2 SNPs and BP

The association of ACE2 SNPs with BP and hypertension is shown in Table 3. By linear regression analysis, ACE2 SNPs rs2074192, rs4240157, and rs4646188 were significantly associated with the prevalence of hypertension, and rs4240157 and rs4646188 were significantly associated with systolic BP in the dominant model. In men, there were no associations with ACE2 variants with systolic or diastolic BP. However, the prevalence of hypertension was significantly higher with the rs2074192 C

allele ( $P = 0.023$ ), rs4240157 G allele ( $P = 0.016$ ) and rs464188 T allele ( $P = 0.006$ ). In women, there was an association with two ACE2 SNPs (rs4240157, rs4646188) and systolic BP, although these associations were of borderline significance. Similar to men, women with the ACE2 rs4240157 G allele were more likely to have hypertension ( $P = 0.009$ ). After accounting for multiple testing (single test *P* value of 0.01), the association of SNPs rs4646188 in men and rs4240157 in women with the prevalence of hypertension remained significant. The rs4646188 T allele

**Table 4 | Association of ACE2 SNP rs1978124 with cardiac function in men and LV mass in women**

|       |                             | SNP rs1978124 genotypes | Adjusted mean $\pm$ s.e.     | Adjusted P value <sup>a</sup> |
|-------|-----------------------------|-------------------------|------------------------------|-------------------------------|
| Men   | LV ejection fraction (%)    | GG                      | 67.5 $\pm$ 1.2               | 0.007                         |
|       |                             | AA                      | 62.3 $\pm$ 1.1               |                               |
| Women | LV mass (g/m <sup>2</sup> ) | GG $\pm$ GA             | 92.6 $\pm$ 2.1 <sup>b</sup>  | 0.040                         |
|       |                             | AA                      | 104.4 $\pm$ 3.8 <sup>b</sup> |                               |

Data expressed as mean  $\pm$  s.e.

ACE2, angiotensin-converting enzyme 2; LV, left ventricular; SNP, single-nucleotide polymorphism.

<sup>a</sup>P value for association of LV mass and LV ejection fraction with SNP rs1978124 adjusted for covariates age, body mass index, hypertension, use of antihypertensive medication, and systolic and diastolic blood pressure. <sup>b</sup>Data are for the recessive model for SNP rs1978124, GG + GA vs. AA.

was associated with a higher odds ratio for hypertension in men, independently of age, BMI and antihypertensive medication use (odds ratio 4.8 (95% confidence intervals, 1.2–19.7),  $P = 0.031$ ). The rs4240157 G allele was not independently associated with hypertension after controlling for age, BMI and antihypertensive medication use (odds ratio 1.6 (0.6–4.7),  $P = 0.384$ ).

#### Relationship between ACE2 SNPs and cardiac hypertrophy

The association of ACE2 SNPs with LV mass index, LVH, and systolic function is shown in **Table 3**. In men, there was a trend towards increased LV mass index with the rs1978124 A allele but the association did not reach statistical significance ( $P = 0.07$ ). However in women the rs1978124 A allele was significantly associated with an increased LV mass index in the recessive model ( $P = 0.008$ ). This association remained significant after covariant adjustment for age, BMI, hypertension, antihypertensive medications, and systolic and diastolic BP ( $P = 0.040$ , **Table 4**). There was a trend towards increased LV mass index and LVH with the dominant model in women with SNPs rs4240157 and rs4646156. However this did not reach significance after correcting for multiple testing.

#### Relationship between ACE2 SNPs and systolic function

In men, ACE2 rs1978124 was associated with systolic function. Men with the A allele of rs1978124 had a significantly lower systolic function (LVEF in GG vs. AA, 67.2% vs. 62.3%,  $P = 0.002$ ). After adjustment for age, BMI, hypertension, antihypertensive medications, and systolic and diastolic BP, the A allele remained significantly associated with a lower LVEF ( $P = 0.007$ , **Table 4**). In women, none of the SNPs studied were associated with systolic function.

#### DISCUSSION

This is the first study to investigate variation in the ACE2 gene with BP, LV mass, LVH, and cardiac function in a Caucasian population with type 2 diabetes. We report that the ACE2 SNPs rs464188 and rs4240157 were associated with hypertension in men and women, and that the rs1978124 A allele was associated with a lower ejection fraction in men and with increased LV mass in women.

#### ACE2, BP and hypertension

To date, association studies with BP, hypertension and ACE2 have produced inconsistent results, which may reflect the ethnic background of the subjects, the underlying cardiovascular phenotype and the ACE2 SNPs investigated. A strength of our study was the use of a population in which 80% of subjects had hypertension, thus enriching our cohort to study gene associations. Our results are at variance with a study in a nondiabetic Caucasian population which reported no association with four ACE2 SNPs (rs1978124, rs2285666, rs879922, and rs714205) and hypertension prevalence.<sup>15</sup> However, our results are in agreement with a study in Austrian Caucasians which reported no associations with ACE2 and actual systolic and diastolic BP.<sup>19</sup> Although some of the ACE2 SNPs that we studied were different to the previous Caucasian studies, we performed a comprehensive analysis of the ACE2 gene. The five genotyped ACE2 SNPs in this study captured 100% of common alleles across the ACE2 gene. Three of the initially selected SNPs were unsuitable for the genotyping assay and therefore two alternative haplotype tagging ACE2 SNPs that were in strong linkage disequilibrium ( $D' = 1.0$ ) with the initial SNPs were selected and genotyped.

By contrast, in a study of 1494 Han Chinese subjects,<sup>29</sup> the ACE2 rs1978124 SNP was a risk factor for stage 2 hypertension in males, and in the GenSalt study in subjects of Chinese ancestry, ACE2 SNP rs4646174 was associated with systolic and diastolic BP responses to potassium supplementation in men, but not in women.<sup>30</sup> Zhong *et al.* showed that the ACE2 rs2285666 GG genotype was associated with higher diastolic BP in female Chinese subjects with the metabolic syndrome,<sup>17</sup> but a different group showed no association of ACE2 rs2285666 with essential hypertension in men or women from the northern Han Chinese population.<sup>31</sup>

#### ACE2 and LVH

We observed a trend towards increased LV mass index with ACE2 rs1978124 in men and a significant association with LV mass index in women. In the Austrian study,<sup>19</sup> there were significant associations with the minor alleles of four ACE2 SNPs (rs4646156, rs879922, rs4240157, and rs233575) and LV mass after adjusting for age, BMI, antihypertensive medications, and systolic BP, but this association was not seen in women. The same four SNPs and a haplotype consisting of the minor alleles of these SNPs were significantly associated with LVH in men.<sup>19</sup> In our study, the ACE2 rs1978124 SNP was significantly associated with LV mass index in women, but this SNP was not genotyped in the Austrian study.<sup>19</sup>

#### ACE2 and systolic function

In women, none of the SNPs studied were associated with systolic function, whereas in men, the rs1978124 A allele was associated with a significantly lower ejection fraction, although still within the normal range between the genotype groups. It is important to note that heart failure is a common complication of diabetes<sup>32,33</sup> and can occur with both reduced and normal (or preserved) ejection fraction.<sup>34</sup> Interestingly,

the same SNP (which is also known as A1075G) is associated with increased mortality in men with acute coronary syndrome,<sup>20</sup> with increased systolic BP in Han Chinese men,<sup>29</sup> and with myocardial infarction in Chinese women.<sup>18</sup> The MONICA Augsburg study<sup>19</sup> found no association with the SNPs they studied and systolic function in men or women, but as mentioned earlier, the *ACE2* rs1978124 was not genotyped in this cohort.

Previous studies that have investigated *ACE2* SNPs have also reported inconsistencies in their association with cardiovascular and metabolic risk factors in men and women. The *ACE2* gene is located on the X chromosome and it is well known that the development of cardiovascular diseases display gender-specific characteristics. Gender and sex hormones are known to affect components of the RAS<sup>35</sup> and the lack of *ACE2* gene associations in women may reflect the effects of gender. In addition, *ACE2* is located on Xp22 where many genes are known to escape X-inactivation and there is a variable degree of expression that can contribute to sexually dimorphic traits.<sup>36</sup>

The underlying functional mechanism by which *ACE2* rs1978124 affects systolic function in men are unclear and requires further investigation, but our finding is supported by experimental evidence in *ACE2* knockout mice,<sup>11</sup> which have severe impairment of cardiac systolic function. Interestingly as in our study, the abnormalities are more severe in male than female mice, although with time, cardiac dysfunction develops in both male and female animals. Others have reported that genetic deletion of *ACE2* accelerates cardiac hypertrophy and shortens the time taken to develop heart failure.<sup>13</sup> The extent of linkage disequilibrium with rs1978124 and SNPs upstream of intron 1 particularly in the promoter region need further examination, as it may indicate that the functional variant lies in this region of the gene. We are currently following-up the carriers of the A allele of *ACE2* rs1978124 to assess whether they too go on to develop heart failure.

A limitation of this study, as well as all other gene association studies, is a lack of data on plasma *ACE2* activity levels. We have previously shown that cardiac *ACE2* protein expression is upregulated in the explanted human ischemic failing heart,<sup>37</sup> and others have shown that plasma *ACE2* levels correlate with the severity of heart failure in man,<sup>38</sup> and are increased in prehypertensive subjects.<sup>39</sup> It is not yet clear if the increase/decrease in circulating *ACE2* is the cause or the consequence of heart failure or high BP. Given the opposing roles that ACE and *ACE2* play in the metabolism of Ang II, the relative balance of ACE and *ACE2* at both the tissue level, and in the circulation will play a role in the relative balance of the constrictor versus the dilator arm of the RAS.

Most recently, there have been two studies that have investigated *ACE2* and nephropathy in type 1 diabetes in Caucasian populations from Finland ( $n = 823$ )<sup>16</sup> and the British Isles ( $n = 1,467$ ).<sup>40</sup> Neither study found any association with the *ACE2* SNPs investigated and diabetic nephropathy, and in the Finnish study, no association with BP was reported.

In conclusion, this is the first study to investigate genetic variation in *ACE2* with BP, LV mass, LVH and systolic function in a Caucasian population with type 2 diabetes. We have found evidence of associations between *ACE2* and hypertension in men. The *ACE2* rs1978124 variant was associated with LV mass in women and with systolic function in men. Further investigation into the association between *ACE2* SNPs rs464188 and rs4240157 with hypertension, and rs1978124 with systolic function in a population without diabetes is warranted. Our results do require replication in other cohorts of patients with type 2 diabetes in whom cardiac function has also been assessed.

**Acknowledgments:** This study was undertaken with the generous support of the National Health and Medical Research Council (NHMRC), Australia. S.K.P. was supported by an Early Career Researcher Grant, University of Melbourne, B.W. was supported by an NHMRC and National Heart Foundation scholarship award and Pfizer CardioVascular Lipid grant. We thank the sonographers who performed the echocardiograms and the individuals who participated in this study. S.K.P. designed the study, performed the laboratory work, analyzed and interpreted the data, wrote the manuscript, and reviewed and edited the manuscript. B.W. acquired, analyzed, and interpreted the data, and reviewed and edited the manuscript. M.O., R.J.M., S.G., E.V., S.P., and G.J. acquired the data and reviewed and edited the manuscript. P.M.S. acquired, analyzed, and reviewed the manuscript. L.M.B. designed the study, interpreted the data, wrote the manuscript and reviewed and edited the manuscript.

**Disclosure:** The authors declared no conflict of interest.

- Expert panel on detection evaluation, and treatment of high blood cholesterol in adults. Executive summary of the third report of the national cholesterol education program (NCEP) expert panel on detection, evaluation, and treatment of high blood cholesterol in adults (Adult Treatment Panel III). *JAMA* 2001; 285:2486–2497.
- Fox CS, Coady S, Sorlie PD, D'Agostino RB Sr, Pencina MJ, Vasan RS, Meigs JB, Levy D, Savage PJ. Increasing cardiovascular disease burden due to diabetes mellitus: the Framingham Heart Study. *Circulation* 2007; 115:1544–1550.
- Mulnier HE, Seaman HE, Raleigh VS, Soedamah-Muthu SS, Colhoun HM, Lawrenson RA. Mortality in people with type 2 diabetes in the UK. *Diabet Med* 2006; 23:516–521.
- Stamler J, Vaccaro O, Neaton JD, Wentworth D. Diabetes, other risk factors, and 12-yr cardiovascular mortality for men screened in the Multiple Risk Factor Intervention Trial. *Diabetes Care* 1993; 16:434–444.
- Nichols GA, Gullion CM, Koro CE, Ephross SA, Brown JB. The incidence of congestive heart failure in type 2 diabetes: an update. *Diabetes Care* 2004; 27:1879–1884.
- Galderisi M, Anderson KM, Wilson PW, Levy D. Echocardiographic evidence for the existence of a distinct diabetic cardiomyopathy (the Framingham Heart Study). *Am J Cardiol* 1991; 68:85–89.
- Cooper ME, Johnston CI. Optimizing treatment of hypertension in patients with diabetes. *JAMA* 2000; 283:3177–3179.
- Tipnis SR, Hooper NM, Hyde R, Karran E, Christie G, Turner AJ. A human homolog of angiotensin-converting enzyme. Cloning and functional expression as a captopril-insensitive carboxypeptidase. *J Biol Chem* 2000; 275:33238–33243.
- Donoghue M, Hsieh F, Baronas E, Godbout K, Gosselin M, Stagliano N, Donovan M, Woolf B, Robison K, Jeyaseelan R, Breitbart RE, Acton S. A novel angiotensin-converting enzyme-related carboxypeptidase (*ACE2*) converts angiotensin I to angiotensin 1-9. *Circ Res* 2000; 87:E1–E9.
- Burrell LM, Johnston CI, Tikellis C, Cooper ME. *ACE2*, a new regulator of the renin-angiotensin system. *Trends Endocrinol Metab* 2004; 15:166–169.
- Crackower MA, Sarao R, Oudit GY, Yagil C, Kozieradzki I, Scanga SE, Oliveiras-Santos AJ, da Costa J, Zhang L, Pei Y, Scholey J, Ferrario CM, Manoukian AS, Chappell MC, Backx PH, Yagil Y, Penninger JM. Angiotensin-converting enzyme 2 is an essential regulator of heart function. *Nature* 2002; 417:822–828.
- Tikellis C, Johnston CI, Forbes JM, Burns WC, Burrell LM, Risvanis J, Cooper ME. Characterization of renal angiotensin-converting enzyme 2 in diabetic nephropathy. *Hypertension* 2003; 41:392–397.
- Yamamoto K, Ohishi M, Katsuya T, Ito N, Ikushima M, Kaibe M, Tataru Y, Shiota A, Sugano S, Takeda S, Rakugi H, Ogihara T. Deletion of angiotensin-converting

- enzyme 2 accelerates pressure overload-induced cardiac dysfunction by increasing local angiotensin II. *Hypertension* 2006; 47:718–726.
14. Yi L, Gu YH, Wang XL, An LZ, Xie XD, Shao W, Ma LY, Fang JR, An YD, Wang F, Zhang DL. Association of ACE, ACE2 and UTS2 polymorphisms with essential hypertension in Han and Dongxiang populations from north-western China. *J Int Med Res* 2006; 34:272–283.
  15. Benjafeld AV, Wang WY, Morris BJ. No association of angiotensin-converting enzyme 2 gene (ACE2) polymorphisms with essential hypertension. *Am J Hypertens* 2004; 17:624–628.
  16. Fröjdö S, Sjöling L, Parkkonen M, Mäkinen VP, Kilpikari R, Pettersson-Fernholm K, Forsblom C, Fagerudd J, Tikellis C, Cooper ME, Wessman M, Groop PH; FinnDiane Study Group. Polymorphisms in the gene encoding angiotensin I converting enzyme 2 and diabetic nephropathy. *Diabetologia* 2005; 48:2278–2281.
  17. Zhong J, Yan Z, Liu D, Ni Y, Zhao Z, Zhu S, Tepel M, Zhu Z. Association of angiotensin-converting enzyme 2 gene A/G polymorphism and elevated blood pressure in Chinese patients with metabolic syndrome. *J Lab Clin Med* 2006; 147:91–95.
  18. Yang W, Huang W, Su S, Li B, Zhao W, Chen S, Gu D. Association study of ACE2 (angiotensin-converting enzyme 2) gene polymorphisms with coronary heart disease and myocardial infarction in a Chinese Han population. *Clin Sci* 2006; 111:333–340.
  19. Lieb W, Graf J, Götz A, König IR, Mayer B, Fischer M, Stritzke J, Hengstenberg C, Holmer SR, Döring A, Löwel H, Schunkert H, Erdmann J. Association of angiotensin-converting enzyme 2 (ACE2) gene polymorphisms with parameters of left ventricular hypertrophy in men. Results of the MONICA Augsburg echocardiographic substudy. *J Mol Med* 2006; 84:88–96.
  20. Palmer BR, Jarvis MD, Pilbrow AP, Ellis KL, Frampton CM, Skelton L, Yandle TG, Doughty RN, Whalley GA, Ellis CJ, Troughton RW, Richards AM, Cameron VA. Angiotensin-converting enzyme 2 A1075G polymorphism is associated with survival in an acute coronary syndromes cohort. *Am Heart J* 2008; 156:752–758.
  21. Devereux RB, Roman MJ, Paranicas M, O'Grady MJ, Lee ET, Welty TK, Fabsitz RR, Robbins D, Rhoades ER, Howard BV. Impact of diabetes on cardiac structure and function: the strong heart study. *Circulation* 2000; 101:2271–2276.
  22. Srivastava PM, Calafiore P, Macisaac RJ, Patel SK, Thomas MC, Jerums G, Burrell LM. Prevalence and predictors of cardiac hypertrophy and dysfunction in patients with Type 2 diabetes. *Clin Sci* 2008; 114:313–320.
  23. ADA. Standards of medical care in diabetes--2011. *Diabetes Care* 2011; 34: S11–S61.
  24. Lang RM, Bierig M, Devereux RB, Flachskampf FA, Foster E, Pellikka PA, Picard MH, Roman MJ, Seward J, Shanewise JS, Solomon SD, Spencer KT, Sutton MS, Stewart WJ; Chamber Quantification Writing Group; American Society of Echocardiography's Guidelines and Standards Committee; European Association of Echocardiography. Recommendations for chamber quantification: a report from the American Society of Echocardiography's Guidelines and Standards Committee and the Chamber Quantification Writing Group, developed in conjunction with the European Association of Echocardiography, a branch of the European Society of Cardiology. *J Am Soc Echocardiogr* 2005; 18:1440–1463.
  25. Srivastava PM, Thomas MC, Calafiore P, MacIsaac RJ, Jerums G, Burrell LM. Diastolic dysfunction is associated with anaemia in patients with Type II diabetes. *Clin Sci* 2006; 110:109–116.
  26. Mosteller RD. Simplified calculation of body-surface area. *N Engl J Med* 1987; 317:1098.
  27. Barrett JC, Fry B, Maller J, Daly MJ. Haploview: analysis and visualization of LD and haplotype maps. *Bioinformatics* 2005; 21:263–265.
  28. Project ITH. The International HapMap Project. *Nature* 2003; 426:789–796.
  29. Niu W, Qi Y, Hou S, Zhou W, Qiu C. Correlation of angiotensin-converting enzyme 2 gene polymorphisms with stage 2 hypertension in Han Chinese. *Transl Res* 2007; 150:374–380.
  30. Zhao Q, Gu D, Kelly TN, Hixson JE, Rao DC, Jaquish CE, Chen J, Huang J, Chen CS, Gu CC, Whelton PK, He J. Association of genetic variants in the apelin-APJ system and ACE2 with blood pressure responses to potassium supplementation: the GenSalt study. *Am J Hypertens* 2010; 23:606–613.
  31. Huang W, Yang W, Wang Y, Zhao Q, Gu D, Chen R. Association study of angiotensin-converting enzyme 2 gene (ACE2) polymorphisms and essential hypertension in northern Han Chinese. *J Hum Hypertens* 2006; 20:968–971.
  32. MacDonald MR, Petrie MC, Hawkins NM, Petrie JR, Fisher M, McKelvie R, Aguilar D, Krum H, McMurray JJ. Diabetes, left ventricular systolic dysfunction, and chronic heart failure. *Eur Heart J* 2008; 29:1224–1240.
  33. From AM, Scott CG, Chen HH. The development of heart failure in patients with diabetes mellitus and pre-clinical diastolic dysfunction a population-based study. *J Am Coll Cardiol* 2010; 55:300–305.
  34. Takeuchi N, Sakata Y, Nishida Y, Nomura Y, Makino T, Maeda T, Tada H, Kimoto T, Ueno S, Fujiwara K. [A case of peritoneal serous papillary carcinoma]. *Gan To Kagaku Ryoho* 2011; 38:1337–1340.
  35. Fischer M, Baessler A, Schunkert H. Renin angiotensin system and gender differences in the cardiovascular system. *Cardiovasc Res* 2002; 53:672–677.
  36. Carrel L, Willard HF. X-inactivation profile reveals extensive variability in X-linked gene expression in females. *Nature* 2005; 434:400–404.
  37. Burrell LM, Risvanis J, Kubota E, Dean RG, MacDonald PS, Lu S, Tikellis C, Grant SL, Lew RA, Smith AI, Cooper ME, Johnston CI. Myocardial infarction increases ACE2 expression in rat and humans. *Eur Heart J* 2005; 26:369–75; discussion 322.
  38. Epelman S, Tang WH, Chen SY, Van Lente F, Francis GS, Sen S. Detection of soluble angiotensin-converting enzyme 2 in heart failure: insights into the endogenous counter-regulatory pathway of the renin-angiotensin-aldosterone system. *J Am Coll Cardiol* 2008; 52:750–754.
  39. Keidar S, Strizevsky A, Raz A, Gamliel-Lazarovich A. ACE2 activity is increased in monocyte-derived macrophages from prehypertensive subjects. *Nephrol Dial Transplant* 2007; 22:597–601.
  40. Currie D, McKnight AJ, Patterson CC, Sadlier DM, Maxwell AP, UK Warren 3/GoKinD Study Group. Investigation of ACE, ACE2 and AGTR1 genes for association with nephropathy in Type 1 diabetes mellitus. *Diabet Med* 2010; 27:1188–1194.
